# Supplementary material for: Side Chain Effect of Hydroxypropyl Cellulose Derivatives on Reflection Properties
Source: MDPI journal article supplement (doi:10.3390/polym11101696), 2019-10-16
Supplement: s1 [file s1]

## **Supplementary Materials**

### **Side Chain Effect of Hydroxypropyl Cellulose Derivatives on Reflection Properties**

Kenichiro Hayata and Seiichi Furumi\*

Department of Applied Chemistry, Faculty of Science,  
Tokyo University of Science

1-3 Kagurazaka, Shinjuku, Tokyo 162-8601, Japan

\*Correspondence: furumi@rs.tus.ac.jp.

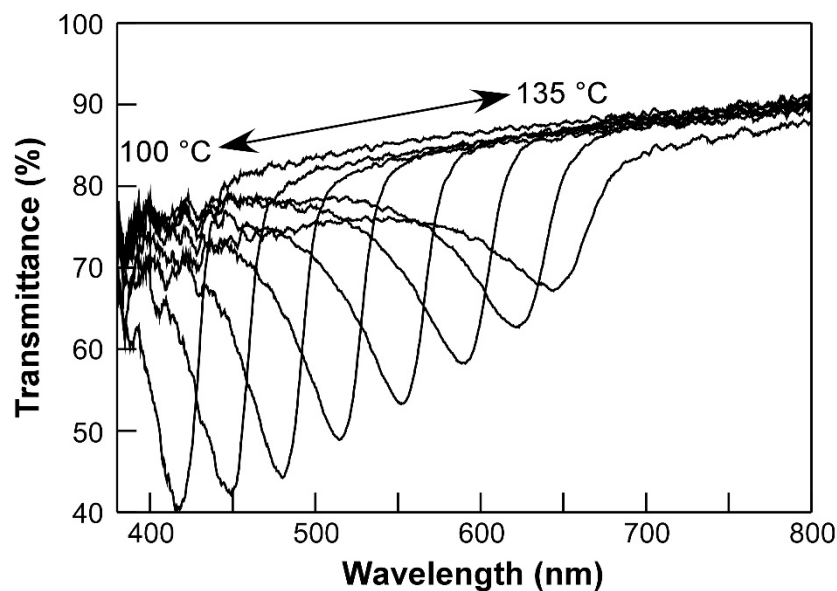

**Figure S1.** Changes in transmission spectrum of an HPC derivative with solely propionyl esters in the side chains (HPC-PrE;  $PrE = 2.98$ ) as a function of temperature.

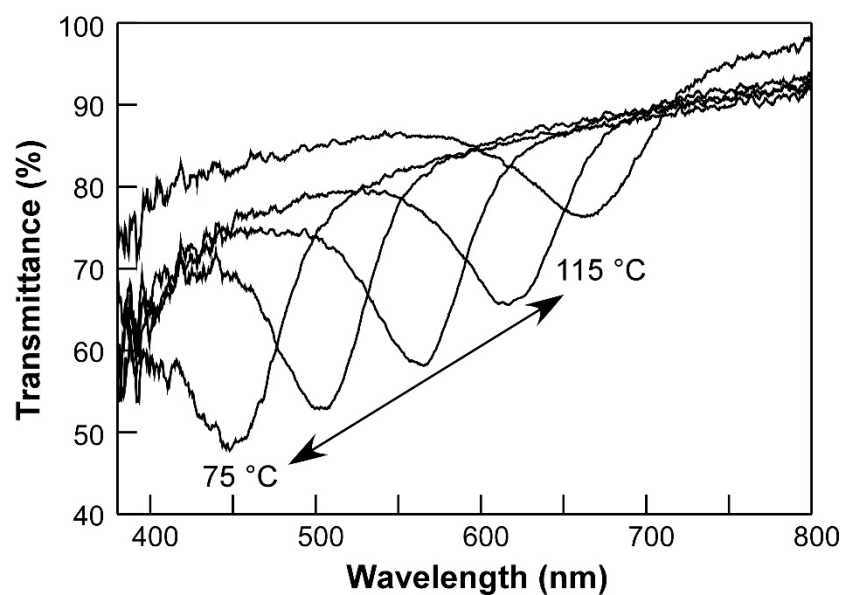

**Figure S2.** Changes in transmission spectrum of an HPC derivative with both propionyl esters and *m*-(trifluoromethyl)phenyl carbamates in the side chains (HPC-PrE/*m*-TFMPC;  $PrE:m\text{-TFMPC} = 2.62:0.31$ ) as a function of temperature.

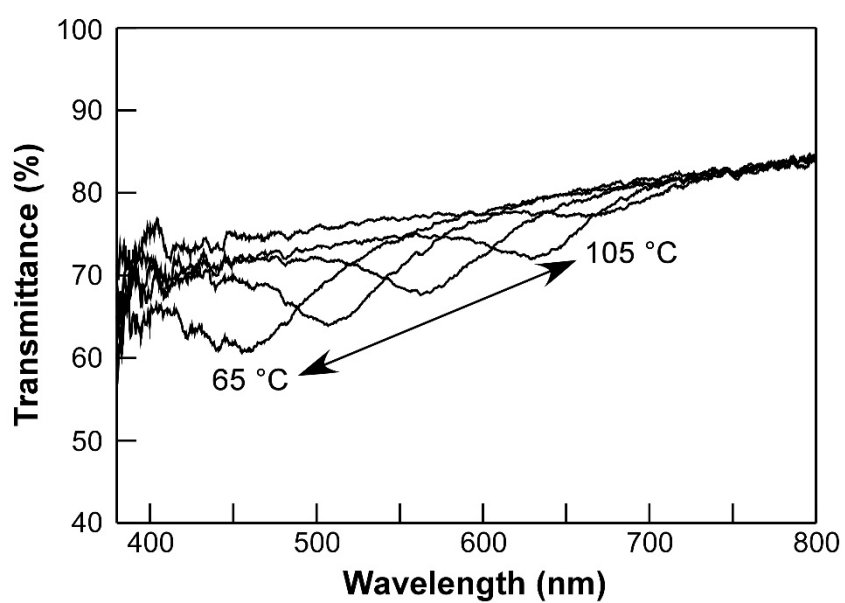

**Figure S3.** Changes in transmission spectrum of an HPC derivative with both propionyl esters and 3,5-*bis*(trifluoromethyl)phenyl carbamates in the side chains (HPC-PrE/*b*-TFMPC; *PrE:b-TFMPC* = 2.71:0.29) as a function of temperature.
